# Supplementary material
Source: PubMed Central journal article supplement (PMC6904114)
Supplement: NIHMS1533649-supplement-2.pdf [file NIHMS1533649-supplement-2.pdf]

# 1 Supplemental Figure 1, Related to Figure 1

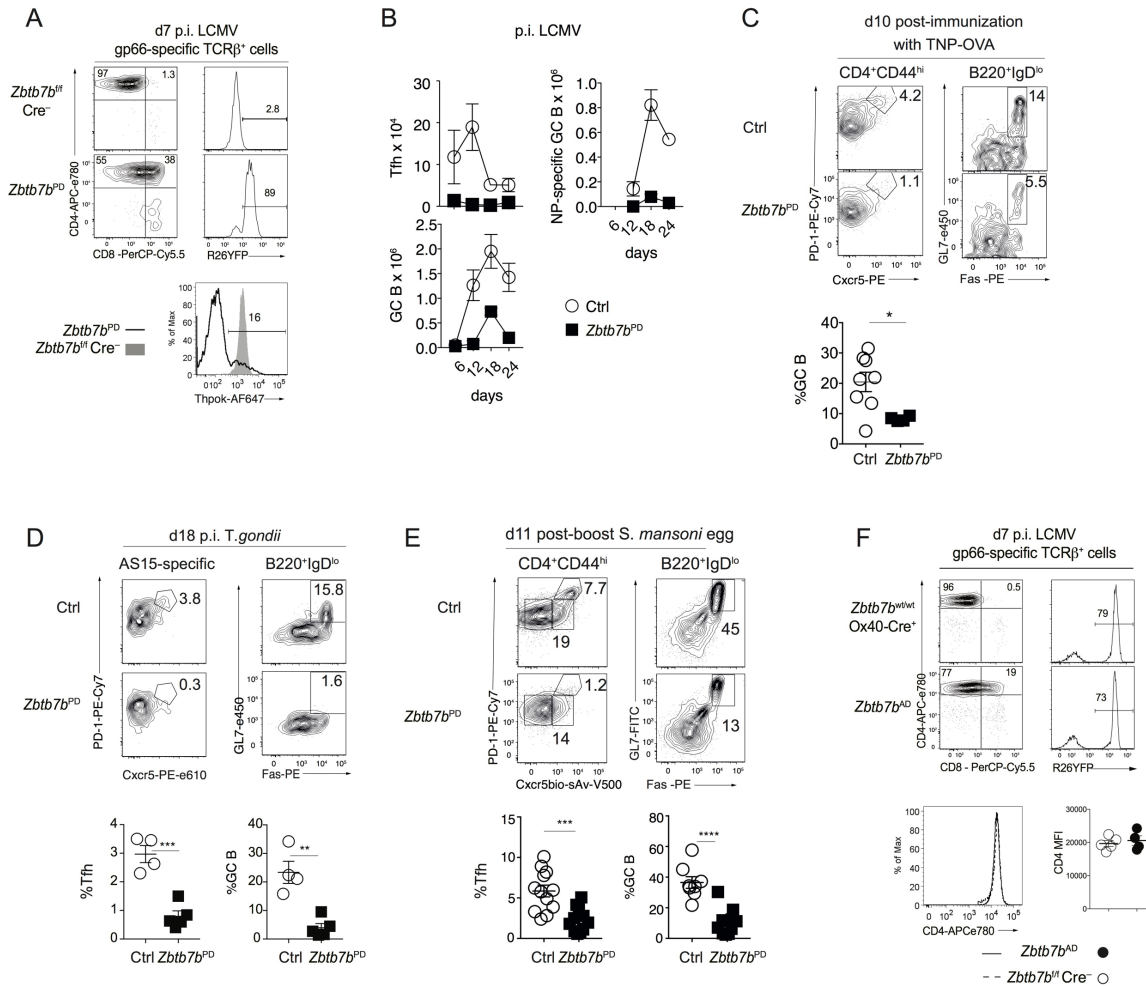

2

## 3 Supplemental Figure 1 (related to Figure 1). Thpok deletion impairs Tfh and GC B 4 differentiation in response to multiple immunogens.

5 (A) (top) Representative plots show expression of CD4 and CD8 (left) or of *Rosa26*<sup>YFP</sup>  
6 (*R26YFP*, right) as a reporter for Cre recombinase activity, on TCRβ<sup>+</sup> I-A<sup>b</sup>-gp66 tetramer  
7 binding (gp66) spleen cells from *Zbtb7b*<sup>PD</sup> and *Zbtb7b*<sup>fl/fl</sup> Cre<sup>-</sup> littermate control mice at  
8 d7 p.i. LCMV. (bottom) Representative histograms of Thpok expression in *Zbtb7b*<sup>PD</sup> or  
9 control (Cre<sup>-</sup>) gp66-specific T cells (number represents percentage of *Zbtb7b*<sup>PD</sup> cells  
10 expressing intra-cellular Thpok protein. (B) Enumeration of Tfh, B220<sup>+</sup>IgD<sup>lo</sup> Fas<sup>+</sup>GL7<sup>+</sup>  
11 total GC B and NP-specific GC B cells in the spleen of *Zbtb7b*<sup>PD</sup> or control mice infected  
12 with LCMV and analyzed at the indicated times p.i. Data is from one experiment with 4  
13 (control) and 3 (*Zbtb7b*<sup>PD</sup>) mice for each time point. (C) *Zbtb7b*<sup>PD</sup> or control mice were  
14 immunized intra-peritoneally with 100μg TNP-OVA and analyzed 10 days post  
15 immunization. Contour plots (top) gated on indicated populations identify Tfh (left, not  
16 YFP-gated) and GC B (right) subsets as defined in Fig. 1AB; data is representative of 4  
17 experiments. Graph (bottom) indicates percent of GC B cells (Ctrl, n=8, *Zbtb7b*<sup>PD</sup>, n=4

18 mice) \* P = 0.03. **(D)** *Zbtb7b*<sup>PD</sup> or control mice were orally infected with 10 *T. gondii*  
19 cysts. Contour plots (top) indicate spleen Tfh (left, gated on *T. gondii* AS15 peptide-  
20 specific CD4<sup>+</sup> T cells) and GC B cells, both defined as in Fig. 1AB, at d18 p.i. Data is  
21 representative of two experiments summarized in graphs (bottom, each symbol represents  
22 an individual mouse); \*\* P = 0.001 \*\*\* P = 0.0004 (Student t-test). **(E)** *Zbtb7b*<sup>PD</sup> and  
23 control mice were injected at day 1 and 14 with inactivated *S. mansoni* eggs and analyzed  
24 11-13 days after the second injection. Contour plots (top) show Cxcr5 vs. PD1 expression  
25 gated on CD44<sup>hi</sup> CD4<sup>+</sup> spleen T cells and Fas vs. GL7 expression gated on B220<sup>+</sup> IgD<sup>lo</sup>  
26 spleen B cells. Data is representative of three experiments, summarized in graphs  
27 (bottom; control, n=8; *Zbtb7b*<sup>PD</sup>, n=10 mice); \*\*\*P < 0.005 \*\*\*\* P < 10<sup>-4</sup> (Student t-test).  
28 **(F)** (top) contour plots of CD4 and CD8 expression on gp66-specific T cells from  
29 *Zbtb7b*<sup>AD</sup> and Ox40-Cre<sup>+</sup> *Zbtb7b*<sup>wt/wt</sup> control mice; (bottom) Histogram overlays (left) and  
30 graph summary (MFI, right) of CD4 expression in d7 p.i. gp66-specific cells.

31 Supplemental Figure 2, Related to Figure 3

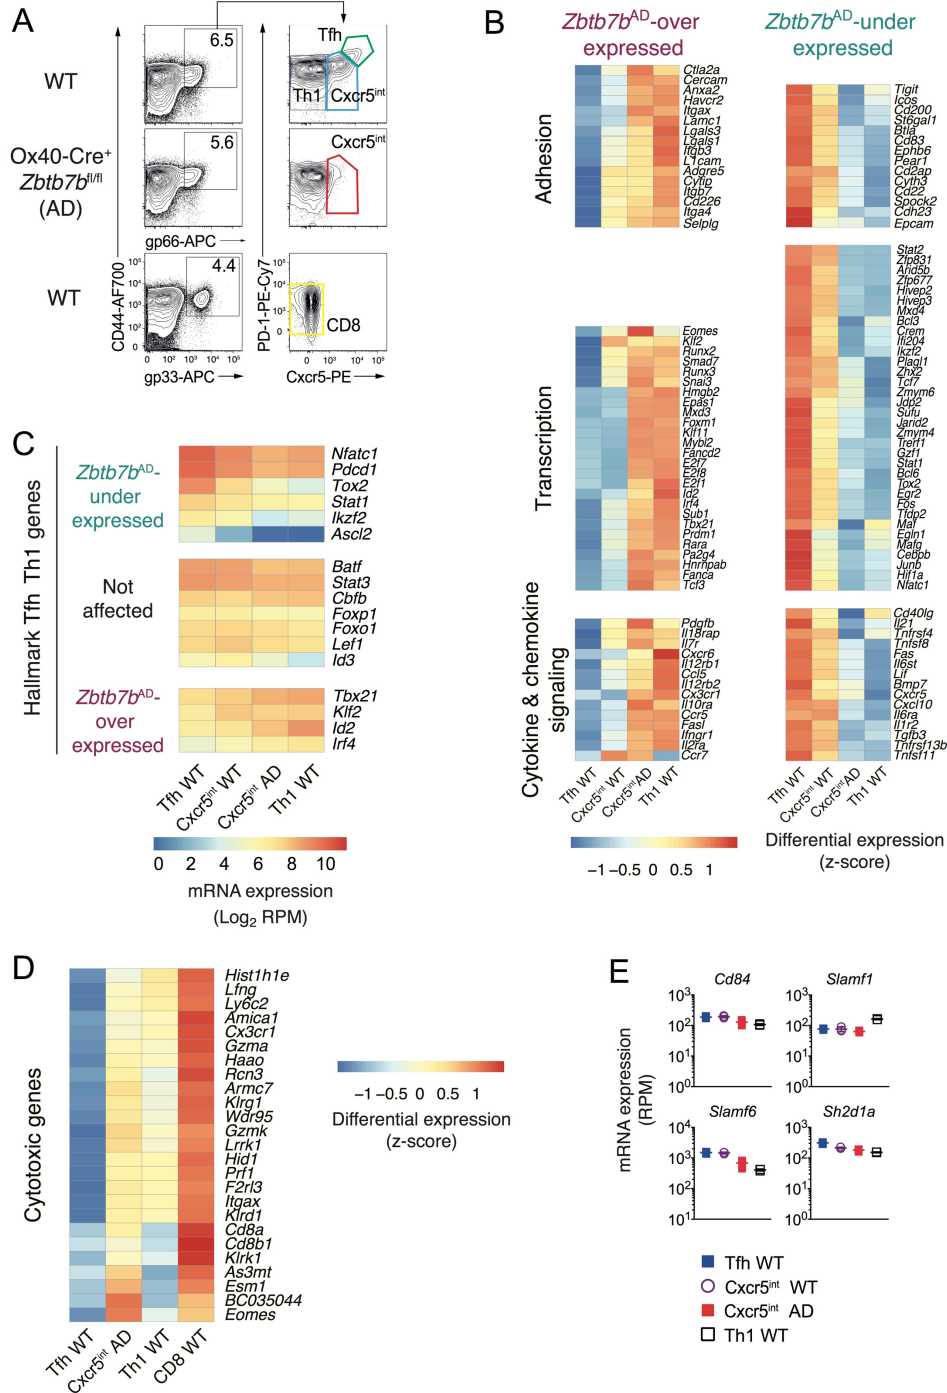

32

33 Supplemental Figure 2 (related to Figure 3). Impact of Thpok on the Tfh cell  
34 transcriptome.

35 (A) Cell purification strategy for RNAseq experiments shown in Fig. 3. CD44<sup>hi</sup> gp66-  
36 specific CD4<sup>+</sup> Rosa26YFP<sup>+</sup> T cells from *Zbtb7b*<sup>AD</sup> or Oxa40-Cre<sup>+</sup> *Zbtb7b*<sup>wt/wt</sup> controls, and  
37 CD44<sup>hi</sup> gp33-specific CD8<sup>+</sup> T cells from Oxa40-Cre<sup>+</sup> *Zbtb7b*<sup>wt/wt</sup> control mice, were sorted

38 from spleen cells at d8 p.i. with-LCMV. **(B)** Heatmaps show row-standardized (z-scores  
39 of average RPM values, scale at bottom) mRNA expression of genes part of adhesion  
40 (top) transcription (middle) or cytokine signaling (bottom) Gene Ontology signatures and  
41 showing a 2-fold or greater differential expression between wild-type Tfh and *Zbtb7b*<sup>AD</sup>  
42 *Cxcr5*<sup>int</sup> CD4<sup>+</sup> T cells. For each heatmap, data is shown for wild-type Tfh and *Cxcr5*<sup>int</sup>  
43 (first two columns) and Th1 cells (fourth column) and *Zbtb7b*<sup>AD</sup> *Cxcr5*<sup>int</sup> cells (AD, third  
44 columns). **(C)** Impact of *Zbtb7b* disruption on genes involved in Tfh differentiation.  
45 Heatmaps show the normalized mRNA expression (Log<sub>2</sub> of average RPM values, scale at  
46 bottom) in cell subsets as in (B). **(D)** Heatmap shows row-standardized expression of  
47 cytotoxic signature genes, defined by 2-fold or greater expression in wild-type LCMV-  
48 specific CD8<sup>+</sup> T cells than in wild-type Th1 CD4<sup>+</sup> T cells. Data is shown as in (B) for  
49 wild-type Tfh and Th1 CD4<sup>+</sup> T cells (first and third columns), *Zbtb7b*<sup>AD</sup> *Cxcr5*<sup>int</sup> CD4<sup>+</sup> T  
50 cells (AD, second column) and wild-type LCMV gp33-specific CD8<sup>+</sup> T cells (fourth  
51 column). **(E)** Plots show expression of genes involved in SLAM adhesion-signaling  
52 displayed as in Fig. 3C.

53 Supplemental Figure 3, Related to Figure 4

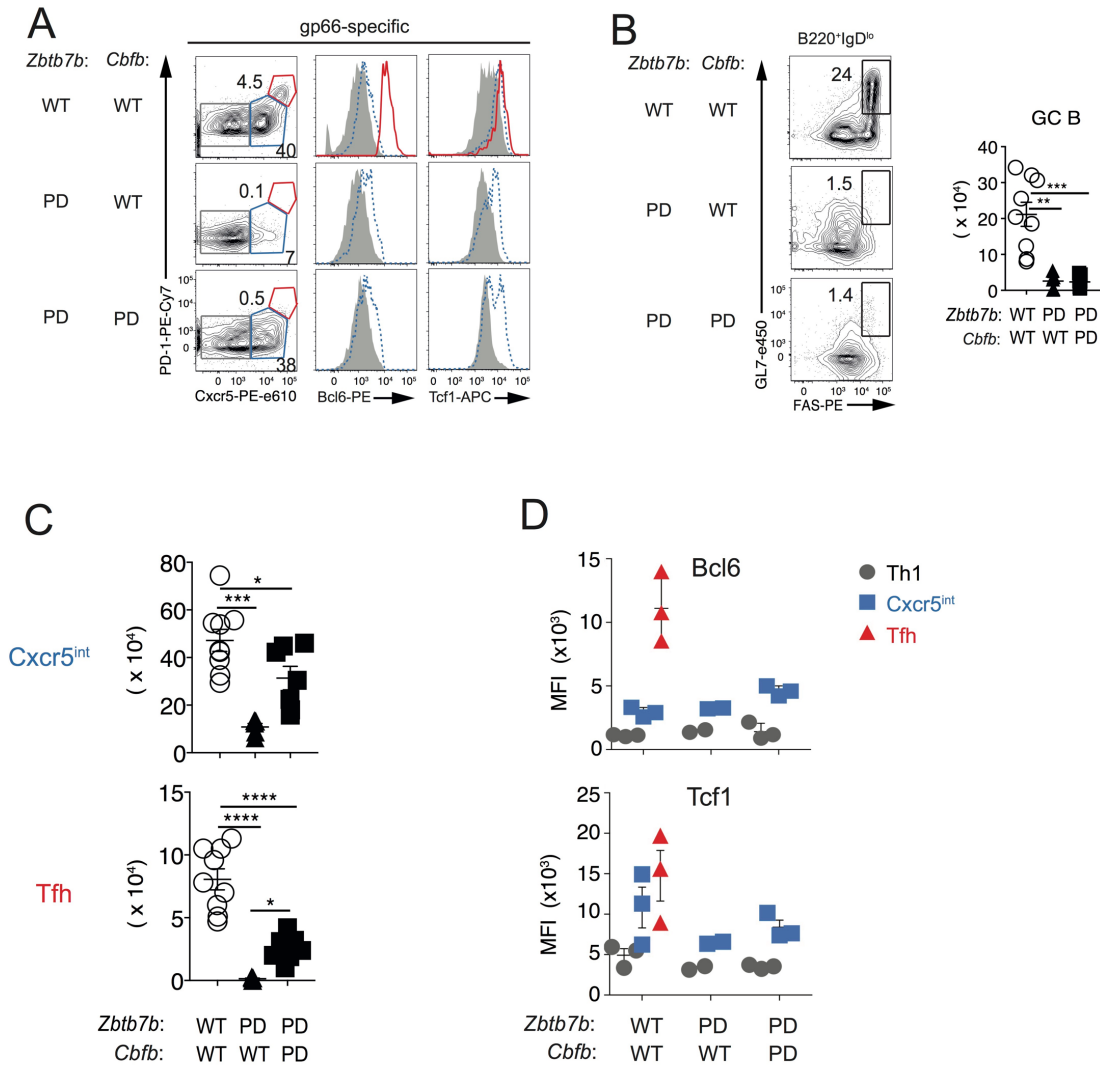

54

55 Supplemental Figure 3 (related to Figure 4). Runx disruption fails to rescue the Tfh  
56 differentiation of Thpok-deficient CD4<sup>+</sup> T cells.

57 (A) Contour plots (left) of Cxcr5 vs. PD1 expression on gp66-specific spleen CD4<sup>+</sup> T  
58 cells define Tfh (red), Cxcr5<sup>int</sup> cells (dotted blue) and Th1 (grey) subsets that are analyzed  
59 for intra-cellular expression of Bcl6 and Tcf1 in overlaid histograms (middle and right).  
60 Data is representative of two independent experiments, with a total of 9 (Ctrl), 5  
61 (*Zbtb7b*<sup>PD</sup>) and 7 (*Zbtb7b*<sup>PD</sup> *Cbfb*<sup>PD</sup>) mice. (B) Contour plots (left) identify GC B cells;  
62 data is from the same experiment as in (A) and is summarized in graph (right). (C)  
63 Graphs summarize cell numbers from (A). (D) Quantification (MFI) of intra-cellular  
64 protein expression in gates defined in (A). Each symbol represents a separate mouse;  
65 \*\*\*\*P<0.0001, \*\*\*P<0.0003, \*\*P<0.005, \*P<0.05 (Student t-test).

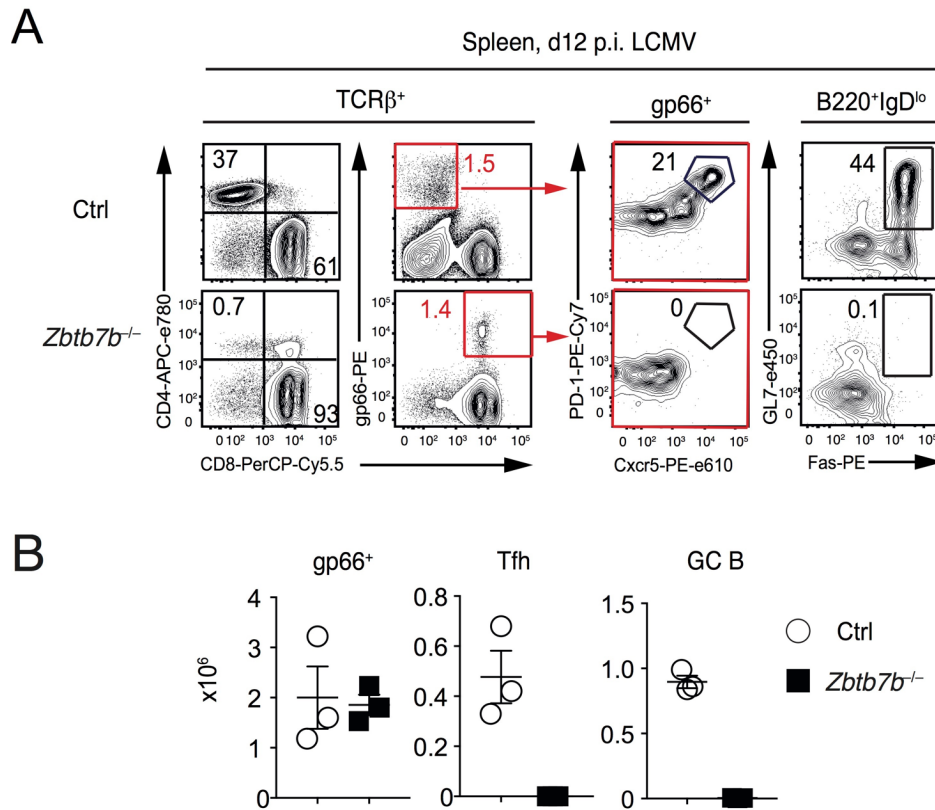

67

68 **Supplemental Figure 4 (related to Figure 6). Germline Thpok inactivation prevents**  
 69 **Tfh and GC B cell differentiation.**

70 (A) *Zbtb7b*<sup>-/-</sup> and control littermates were analyzed d12 p.i with LCMV. Left two  
 71 columns show CD4 and CD8 expression and CD8 expression vs. I-A<sup>b</sup>-gp66-tetramer  
 72 binding gated on TCRβ<sup>+</sup> cells. gp66-specific cells (red box) are analyzed for Cxcr5 vs.  
 73 PD1 expression to define Tfh cells (third column). The right column shows Fas vs. GL7  
 74 expression on B220<sup>+</sup> IgD<sup>lo</sup> spleen B cells. Note that germline deletion of *Zbtb7b* redirects  
 75 MHC II-restricted T cells into the CD8<sup>+</sup>-lineage (Vacchio and Bosselut, 2016). (B)  
 76 Graphs summarize one experiment with 3 mice of each genotype and show numbers of  
 77 indicated cell subsets in each genotype. Data is representative of three independent  
 78 experiments.

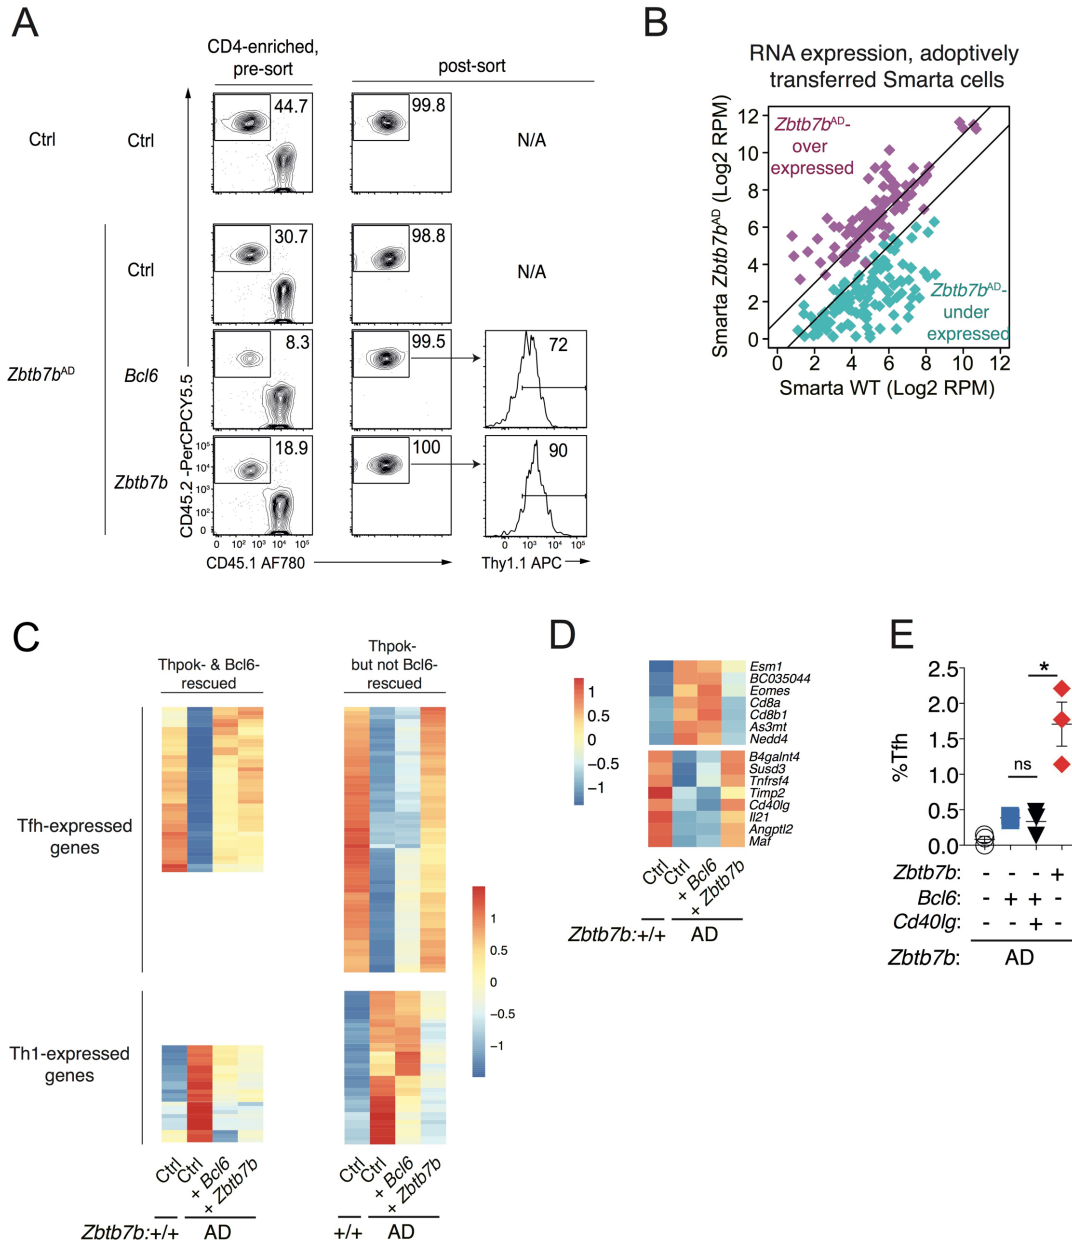

80

81 Supplemental Figure 5 (related to Figure 7). Bcl6-independent impact of Thpok on the Tfh transcriptome.  
82

83 (A) Sorting strategy of Smarta CD4<sup>+</sup> T cells generated as in Fig. 6A and prepared for  
84 RNAseq. Panels show pre-sort and post-sort populations for CD45 allele expression (left  
85 and center columns, respectively). Right histograms show Thy1.1 expression of CD45.2<sup>+</sup>  
86 sorted populations. Data is shown for Smarta cells that were either wild-type (Ctrl) or  
87 *Zbtb7b<sup>AD</sup>* and had been transduced with retroviral vectors expressing Thy1.1 (as a  
88 reporter for transduction) and either no additional protein (Ctrl) or Bcl6 or Thpok (Bcl6  
89 and Thpok “add-back”). Ctrl vector-transduced cells (top two rows) were not sorted for

90 Thy1.1 expression. **(B)** Scatter plot displays mRNA expression ( $\text{Log}_2$  of average RPM  
91 values) in adoptively transferred, control vector-transduced Smarta cells, either wild-type  
92 (x-axis) or *Zbtb7b*<sup>AD</sup> (y-axis) and processed as in (A). Data is shown on the gene set  
93 defined in Fig. 3B by a 4-fold or greater differential expression in wild-type Tfh  
94 compared to *Zbtb7b*<sup>AD</sup> *Cxcr5*<sup>int</sup> cells. Each symbol represents one gene and is color-coded  
95 as in Fig. 3B. Lines show 2-fold differential gene expression. **(C)** Heatmap shows row-  
96 standardized mRNA expression (z-scores of average RPM values, scale on the right) of  
97 169 Tfh- or Th1-signature genes that were Thpok-dependent in “add-back” experiments  
98 (see Methods). **(D)** Heatmap shows row-standardized mRNA expression (z-scores of  
99 average RPM values, scale on the right) on relevant Thpok signature genes (see  
100 Methods). **(E)** Wild-type or *Zbtb7b*<sup>AD</sup> Smarta CD4<sup>+</sup> T cells were retrovirally transduced  
101 with the indicated vectors and processed for analyses of response to LCMV as shown in  
102 Fig. 6A. Graph summarizes percent of Tfh cells among transduced Smarta *Zbtb7b*<sup>AD</sup>  
103 cells; data is from one experiment with 3 mice from each transduction. Significance  
104 determined by Student t-test; \* P<0.02.
